# Supplementary material for: A Combined Gas and Liquid Chromatographic Approach for Quality Evaluation of Saffron-Based Food Supplements
Source: MDPI journal article supplement (doi:10.3390/foods12224071), 2023-11-09

Table S1. Characteristics and composition (data per formulation unit) of saffron food supplements (SFS) under study.

| SFS  | Formulation | Saffron extract content<br>(Bioactive concentration)                         | Other bioactive ingredients<br>(Bioactive concentration)                                                                                                                                                                                                                                                                                                                                                                                                                                                    | Excipients                                                                                                                                                                                                                            |
|------|-------------|------------------------------------------------------------------------------|-------------------------------------------------------------------------------------------------------------------------------------------------------------------------------------------------------------------------------------------------------------------------------------------------------------------------------------------------------------------------------------------------------------------------------------------------------------------------------------------------------------|---------------------------------------------------------------------------------------------------------------------------------------------------------------------------------------------------------------------------------------|
| SFS1 | Caplets     | 14 mg affron®<br>(3.5 % Lepticrosalides®: 3.48<br>% crocins; 0.03% safranal) | None                                                                                                                                                                                                                                                                                                                                                                                                                                                                                                        | Maltodextrins, talcum, food<br>grade shellac, E-171, E-172,<br>magnesium stearate                                                                                                                                                     |
| SFS2 | Capsules    | 15 mg affron®<br>(3.5 % Lepticrosalides®: 3.48<br>% crocins; 0.03% safranal) | Vitamin B6 (0.7 mg)                                                                                                                                                                                                                                                                                                                                                                                                                                                                                         | Maltodextrins, silicon dioxide                                                                                                                                                                                                        |
| SFS3 | Caplets     | 10 mg saffron dry extract<br>(N.D.)                                          | 50 mg <i>Curcuma longa</i> dry<br>extract (N.D.)<br>75 mg <i>Salix alba</i> bark dry<br>extract (19 mg salicin)<br>162 mg Pineapple stem dry<br>extract (160 GDU Bromelain)<br>60 mg <i>Ribes nigrum</i> dry extract<br>(N.D.)<br>200 mg <i>Boswellia serrata</i><br>rubber resin dry extract (N.D.)<br>Resveratrol (30 mg)<br>5 mg Black pepper dry extract<br>Q10 Coenzyme (10 mg)<br>Zinc oxide (12 mg Zn)<br>Copper sulphate (1000 mcg Cu)<br>Astaxanthin (1 mg)<br>Lutein (10 mg)<br>Zeaxanthin (1 mg) | Microcrystalline cellulose,<br>dicalcium phosphate, sodium<br>carboxymethylcellulose, fatty<br>acids mono and diglycerides,<br>silicon dioxide, fatty acids<br>magnesium salts, E1203,<br>E1521, E553b, E101(i), E171,<br>E172, E150d |
| SFS4 | Capsules    | 60 mg saffron dry extract<br>(2 % safranal)                                  | 200 mg <i>Garcinia cambogia</i> dry<br>extract (60% hydroxycitric<br>acid)<br>200 mg Green coffee dry<br>extract (45% chlorogenic acid)                                                                                                                                                                                                                                                                                                                                                                     | Maltodextrins, silicon dioxide,<br>magnesium stearate                                                                                                                                                                                 |
| SFS5 | Capsules    | 40 mg saffron 4:1 extract<br>(2 % safranal)                                  | Vitamin B6 (1.4 mg)                                                                                                                                                                                                                                                                                                                                                                                                                                                                                         | Maltodextrins, magnesium<br>stearate, hypromellose,<br>chlorophyll copper complexes                                                                                                                                                   |
| SFS6 | Capsules    | 180 mg saffron 4:1 extract<br>(N.D.)                                         | Vitamin C (26 mg)<br>Vitamin B6 (10 mg)                                                                                                                                                                                                                                                                                                                                                                                                                                                                     | Magnesium stearate                                                                                                                                                                                                                    |

|       |          |                                                                                              |                                                                                                                                                                             |                                                                                                                                             |
|-------|----------|----------------------------------------------------------------------------------------------|-----------------------------------------------------------------------------------------------------------------------------------------------------------------------------|---------------------------------------------------------------------------------------------------------------------------------------------|
|       |          |                                                                                              | Vitamin B9 (200 µg)<br>Vitamin B12 (25 µg)<br>Vitamin B6 (30 µg)<br>Magnesium (101 mg)<br>L-Tyrosine (100 mg)<br>L-Tryptophan (100 mg)<br>Betain (26 mg)<br>Choline (10 mg) |                                                                                                                                             |
| SFS7  | Capsules | 30 mg SAFFR'ACTIV ®<br>saffron extract<br>(2% safranal)                                      | None                                                                                                                                                                        | Microcrystalline cellulose,<br>magnesium stearate pullulan                                                                                  |
| SFS8  | Capsules | 30 mg affron® saffron extract<br>(3.5 % Lepticrosalides®: 3.48<br>% crocins; 0.03% safranal) | None                                                                                                                                                                        | None                                                                                                                                        |
| SFS9  | Capsules | 200 mg saffron extract<br>(2 % safranal)                                                     | Melatonin (1.8 mg)<br>Vitamin B6 (1.1 mg)<br>L-Tyrosine (100 mg)<br>L-Tryptophan (N.D.)<br>Vitamin C (N.D.)<br>Betain (N.D.)                                                | Maltodextrins, silicon dioxide,<br>magnesium stearate                                                                                       |
| SFS10 | Capsules | 17 mg SAFFR'ACTIV ®<br>saffron extract<br>(2% crocin; 2 % safranal)                          | Vitamin B6 (1.4 mg)                                                                                                                                                         | Maltodextrins, silicon dioxide,<br>hydroxypropylmethylcellulose                                                                             |
| SFS11 | Capsules | 30 mg saffron extract<br>(2 % safranal)                                                      | None                                                                                                                                                                        | Microcrystalline cellulose,<br>maltodextrins, silicon dioxide,<br>magnesium stearate,<br>hydroxypropylmethylcellulose                       |
| SFS12 | Capsules | 30 mg saffron extract<br>(2 % safranal)                                                      | None                                                                                                                                                                        | Microcrystalline cellulose,<br>maltodextrins, silicon dioxide,<br>magnesium stearate,<br>hydroxypropylmethylcellulose                       |
| SFS13 | Capsules | 30 mg saffron extract<br>(3 % crocins)                                                       | Trimagnesium citrate (65 mg)<br>Vitamin B5 (6 mg)<br>Vitamin B6 (1.4 mg)<br>Vitamin B9 (3 µg)                                                                               | Gelatin, maltodextrins, rice<br>extract, rice hulls, arabic gum,<br>sunflower oil                                                           |
| SFS14 | Caplets  | 28 mg affron® saffron extract<br>(3 % crocins; 2 % safranal)                                 | Vitamin B6 (1.4 mg)                                                                                                                                                         | Microcrystalline cellulose,<br>dihydrated bicalcium<br>phosphate, sodium<br>carboxymethylcellulose, silicon<br>dioxide, magnesium stearate, |

|       |          |                                                        |                                                                                                                                                  |                                                                                                         |
|-------|----------|--------------------------------------------------------|--------------------------------------------------------------------------------------------------------------------------------------------------|---------------------------------------------------------------------------------------------------------|
|       |          |                                                        |                                                                                                                                                  | hydroxypropylmethylcellulose, talcum, glycerine, titanium dioxide, red iron oxide and yellow iron oxide |
| SFS15 | Capsules | 15 mg saffron extract (2 % safranal)                   | None                                                                                                                                             | Microcrystalline cellulose, maltodextrins, silicon dioxide, magnesium stearate, gelatin                 |
| SFS16 | Caplets  | 30 mg saffron extract (4 % crocins; 2 % safranal)      | None                                                                                                                                             | Microcrystalline cellulose, silanized microcrystalline cellulose, silicon dioxide, polyvinylpyrrolidone |
| SFS17 | Capsules | 28 mg saffron extract (3.48 % crocins; 0.03% safranal) | <i>Lactobacillus acidophilus</i> (1000 millions)<br><i>Lactobacillus casei</i> (1000 millions)<br><i>Bifidobacterium bifidum</i> (1000 millions) | cellulose, hypromellose, silicon dioxide, magnesium stearate                                            |

\*N.D.: non-declared safranal content.

Table S2. Concentration (mg g<sup>-1</sup>) of picrocrocin, crocin isomers, safranal and kaempferols of reference samples determined by LC-DAD. Standard deviations in parentheses (n = 2).  $\beta$ -D-glucopyranosyl (g),  $\beta$ -D-gentiobiosyl (G),  $\beta$ -D-neopolitanosyl (n), tri- $\beta$ -D-glucopyranosyl (t). ID numbers correspond to peaks in Figure 1.

|                                                        | ID | SE1              | SE2              | SE 3             | DS1              | DS2              | DS3              | DS4            | DS5              |
|--------------------------------------------------------|----|------------------|------------------|------------------|------------------|------------------|------------------|----------------|------------------|
| Kaempferol-3-sophoroside-7-glucoside                   | 1  | 1.88<br>(0.05)   | 1.45<br>(0.02)   | 1.6<br>(0.05)    | 5,88<br>(0,03)   | 6,12<br>(0,03)   | 5.5<br>(0.1)     | 6.6<br>(0.2)   | 6.7<br>(0.2)     |
| Picrocrocin                                            | 2  | 32.6<br>(0.7)    | 29.7<br>(0.5)    | 29.3<br>(0.9)    | 102.8<br>(1.4)   | 91.6<br>(0.1)    | 89.0<br>(2.9)    | 105.4<br>(2.9) | 74.7<br>(1.0)    |
| Kaempferol triglucoside                                | 3  | 0.42<br>(0.02)   | 0.401<br>(0.006) | 0.40<br>(0.01)   | 1.51<br>(0.04)   | 1.53<br>(0.01)   | 1.422<br>(0.007) | 1.63<br>(0.03) | 1.62<br>(0.02)   |
| Kaempferol-7-sophoroside or Kaempferol-3,7-diglucoside | 4  | 0.34<br>(0.02)   | 0.325<br>(0.005) | 0.270<br>(0.006) | 0.97<br>(0.06)   | 1.14<br>(0.02)   | 1.10<br>(0.01)   | 1.01<br>(0.04) | 0.88<br>(0.07)   |
| Kaempferol-3-sophoroside                               | 5  | 4.1<br>(0.1)     | 4.03<br>(0.04)   | 3.9<br>(0.1)     | 13.0<br>(0.3)    | 13.8<br>(0.1)    | 13.0<br>(0.1)    | 14.1<br>(0.4)  | 13.5<br>(0.8)    |
| Kaempferol-3-glucoside                                 | 6  | 0.171<br>(0.006) | 0.14<br>(0.02)   | 0.13<br>(0.02)   | 0.85<br>(0.06)   | 0.730<br>(0.003) | 0.65<br>(0.05)   | 0.69<br>(0.03) | 0.98<br>(0.10)   |
| <i>trans</i> -5-tG                                     | 7  | 0.41<br>(0.04)   | 0.36<br>(0.01)   | 0.37<br>(0.01)   | 1.64<br>(0.01)   | 1.81<br>(0.02)   | 1.50<br>(0.05)   | 1.72<br>(0.05) | 1.42<br>(0.03)   |
| <i>trans</i> -5-nG                                     | 8  | 0.12<br>(0.01)   | 0.118<br>(0.003) | 0.108<br>(0.003) | 0.48<br>(0.01)   | 0.446<br>(0.005) | 0.50<br>(0.01)   | 0.36<br>(0.02) | 0.44<br>(0.01)   |
| <i>trans</i> -4-GG                                     | 9  | 20.5<br>(1.7)    | 19.9<br>(0.6)    | 20.8<br>(0.5)    | 82.9<br>(1.0)    | 89.0<br>(0.3)    | 86.8<br>(2.9)    | 95.6<br>(1.8)  | 76.7<br>(1.1)    |
| <i>trans</i> -4-tg                                     | 10 | 1.63<br>(0.09)   | 0.91<br>(0.04)   | 1.02<br>(0.03)   | 0.80<br>(0.02)   | 0.75<br>(0.01)   | 0.83<br>(0.03)   | 0.97<br>(0.05) | 0.77<br>(0.02)   |
| <i>trans</i> -4-ng                                     | 11 | 0.39<br>(0.03)   | 0.33<br>(0.01)   | 0.31<br>(0.01)   | 1.71<br>(0.01)   | 1.88<br>(0.01)   | 1.7<br>(0.1)     | 1.9<br>(0.1)   | 1.33<br>(0.02)   |
| <i>trans</i> -3-Gg                                     | 12 | 8.1<br>(0.8)     | 7.9<br>(0.2)     | 8.5<br>(0.3)     | 33.7<br>(0.5)    | 35.89<br>(0.2)   | 35.8<br>(1.3)    | 38.8<br>(1.0)  | 32.1<br>(0.6)    |
| <i>trans</i> -2-gg                                     | 13 | 0.6 (0.1)        | 0.58<br>(0.01)   | 0.62<br>(0.01)   | 2.8<br>(0.1)     | 2.64<br>(0.04)   | 2.4<br>(0.1)     | 2.6<br>(0.1)   | 2.7<br>(0.1)     |
| <i>cis</i> -4-GG                                       | 14 | 3.7<br>(0.3)     | 3.24<br>(0.09)   | 3.27<br>(0.09)   | 8.7<br>(0.2)     | 9.71<br>(0.02)   | 11.3<br>(0.3)    | 10.2<br>(0.2)  | 8.485<br>(0.1)   |
| <i>cis</i> -4-ng                                       | 15 | 0.50<br>(0.04)   | 0.51<br>(0.03)   | 0.55<br>(0.02)   | 0.41<br>(0.02)   | 0.373<br>(0.004) | 0.39<br>(0.02)   | 0.42<br>(0.01) | 0.40<br>(0.02)   |
| <i>trans</i> -2-G                                      | 16 | 4.1<br>(0.3)     | 3.3<br>(0.2)     | 3.4<br>(0.1)     | 8.3<br>(0.2)     | 8.81<br>(0.01)   | 8.9<br>(0.3)     | 9.2<br>(0.2)   | 8.7<br>(0.1)     |
| <i>cis</i> -3-Gg                                       | 17 | 1.4<br>(0.1)     | 1.22<br>(0.03)   | 1.25<br>(0.03)   | 3.5<br>(0.1)     | 3.77<br>(0.02)   | 4.6<br>(0.1)     | 4.0<br>(0.1)   | 3.5<br>(0.1)     |
| <i>cis</i> -2-gg                                       | 18 | 0.49<br>(0.05)   | 0.39<br>(0.02)   | 0.44<br>(0.04)   | 1.03<br>(0.03)   | 1.14<br>(0.04)   | 1.16<br>(0.04)   | 1.13<br>(0.01) | 1.301<br>(0.005) |
| <i>trans</i> -1-g                                      | 19 | 0.42<br>(0.04)   | 0.29<br>(0.01)   | 0.30<br>(0.01)   | 0.31<br>(0.01)   | 0.309<br>(0.001) | 0.37<br>(0.01)   | 0.31<br>(0.02) | 0.33<br>(0.01)   |
| <i>cis</i> -2-G                                        | 20 | 0.28<br>(0.03)   | 0.18<br>(0.01)   | 0.18<br>(0.01)   | 0.180<br>(0.004) | 0.184<br>(0.002) | 0.23<br>(0.01)   | 0.18<br>(0.01) | 0.19<br>(0.01)   |
| <i>cis</i> -1-g                                        | 21 | 0.07<br>(0.01)   | 0.038<br>(0.003) | 0.043<br>(0.002) | 0.016<br>(0.005) | 0.031<br>(0.001) | 0.051<br>(0.004) | < LOQ          | 0.023<br>(0.003) |
| <i>trans</i> -crocetin                                 | 22 | 0.12<br>(0.02)   | 0.06<br>(0.02)   | 0.06<br>(0.01)   | 0.16<br>(0.02)   | 0.273<br>(0.002) | 0.2<br>(0.01)    | 0.22<br>(0.01) | 0.29<br>(0.02)   |
| <i>cis</i> -crocetin                                   | 23 | 0.009<br>(0.004) | < LOQ            | < LOQ            | - <sup>#</sup>   | -                | -                | -              | -                |

|          |   |                |                |                |                |                |              |                |                |
|----------|---|----------------|----------------|----------------|----------------|----------------|--------------|----------------|----------------|
| Safranal | * | 0.50<br>(0.03) | 0.35<br>(0.01) | 0.27<br>(0.01) | 3.08<br>(0.05) | 2.52<br>(0.01) | 2.6<br>(0.1) | 2.69<br>(0.05) | 3.30<br>(0.04) |
|----------|---|----------------|----------------|----------------|----------------|----------------|--------------|----------------|----------------|

# non detected.

Table S3. Concentrations of volatiles and low molecular weight carbohydrates (mg g<sup>-1</sup>) present in reference samples by GC-MS. Standard deviations in parentheses (*n* = 2).

|                                                                     | ID | SE1              | SE2              | SE 3             | DS1             | DS2              | DS3              | DS4              | DS5              |
|---------------------------------------------------------------------|----|------------------|------------------|------------------|-----------------|------------------|------------------|------------------|------------------|
| Dihydro-4-hydroxy-2(3H)-furanone                                    | 1  | 0.008<br>(0.001) | 0.002<br>(0.003) | 0.005<br>(0.001) | 0.07<br>(0.02)  | 0.11<br>(0.01)   | 0.14<br>(0.03)   | 0.12<br>(0.03)   | 0.09<br>(0.01)   |
| Isophorone                                                          | 2  | 0.013<br>(0.002) | 0.008<br>(0.004) | 0.008<br>(0.001) | 0.23<br>(0.004) | 0.20<br>(0.01)   | 0.24<br>(0.04)   | 0.24<br>(0.01)   | 0.23<br>(0.01)   |
| Ketoisophorone                                                      | 3  | 0.006<br>(0.001) | 0.004<br>(0.001) | 0.002<br>(0.003) | 0.17<br>(0.01)  | 0.11<br>(0.01)   | 0.121<br>(0.005) | 0.131<br>(0.004) | 0.117<br>(0.005) |
| Dihydrooxophorone                                                   | 4  | 0.01<br>(0.0001) | 0.006<br>(0.003) | 0.007<br>(0.001) | 0.20<br>(0.01)  | 0.199<br>(0.005) | 0.2<br>(0.005)   | 0.208<br>(0.002) | 0.18<br>(0.01)   |
| 4-Hydroxy-isophorone                                                | 6  | 0.014<br>(0.001) | 0.009<br>(0.004) | 0.012<br>(0.001) | 0.17<br>(0.01)  | 0.14<br>(0.01)   | 0.18<br>(0.03)   | 0.202<br>(0.02)  | 0.16<br>(0.01)   |
| 4-Hydroxy-2,6,6-trimethyl-3-oxocyclohexa-1,4-diene-1-carboxaldehyde | 7  | 0.007<br>(0.001) | 0.01<br>(0.01)   | 0.005<br>(0.003) | 0.26<br>(0.05)  | 0.17<br>(0.01)   | 0.2<br>(0.1)     | 0.25<br>(0.01)   | 0.19<br>(0.01)   |
| HTCC                                                                | 8  | 0.034<br>(0.001) | 0.022<br>(0.01)  | 0.027<br>(0.001) | 0.46<br>(0.03)  | 0.31<br>(0.01)   | 0.5<br>(0.1)     | 0.59<br>(0.01)   | 0.40<br>(0.02)   |
| Fructose*                                                           | 9  | 2.1<br>(0.1)     | 1.4<br>(0.3)     | 1.2<br>(0.1)     | 13.0<br>(0.1)   | 12.05<br>(0.05)  | 12.4<br>(0.2)    | 12.1<br>(0.8)    | 12.0<br>(0.1)    |
| Glucose*                                                            | 10 | 11.8<br>(1.1)    | 7.0<br>(0.3)     | 5.5<br>(0.1)     | 29.0<br>(1.0)   | 50.0<br>(0.3)    | 41.4<br>(1.0)    | 44.3<br>(2.9)    | 30.8<br>(1.0)    |
| <i>myo</i> -Inositol*                                               | 11 | 1.01<br>(0.01)   | 0.75<br>(0.02)   | 0.4<br>(0.3)     | 2.78<br>(0.07)  | 2.6<br>(0.1)     | 2.45<br>(0.1)    | 2.6<br>(0.2)     | 2.85<br>(0.03)   |
| Sucrose*                                                            | 12 | 9.2<br>(0.1)     | 7.3<br>(0.6)     | 7.4<br>(0.1)     | 4.1<br>(0.1)    | 2.1<br>(0.4)     | 2.0<br>(1.9)     | 3.23<br>(0.01)   | 4.7<br>(0.6)     |
| Maltose*                                                            | 15 | 7.0<br>(0.7)     | 3.5<br>(0.1)     | 3.7<br>(0.2)     | ND              | ND               | ND               | ND               | ND               |
| Gentiobiose*                                                        | 16 | 5.6<br>(0.1)     | 1.5<br>(0.1)     | 1.27<br>(0.03)   | 7.78<br>(0.1)   | 3.4<br>(0.9)     | 4.0<br>(0.3)     | 3.75<br>(0.04)   | 8.2<br>(1.2)     |
| Maltotriose*                                                        | 17 | 68.5<br>(12.5)   | 38.0<br>(7.8)    | 28.8<br>(2.7)    | - <sup>#</sup>  | -                | -                | -                | -                |

\* derivatized compounds; <sup>#</sup>: non detected

Figure S1. GC-MS chromatograms of saffron dried stigma (DS1) extract in dichloromethane (A) and water after derivatization (B). Peak identifications in Table S3. \*: artefact; \*\*: HTCC derivative; 13: unknown glycoside; 14: picrocrocin.

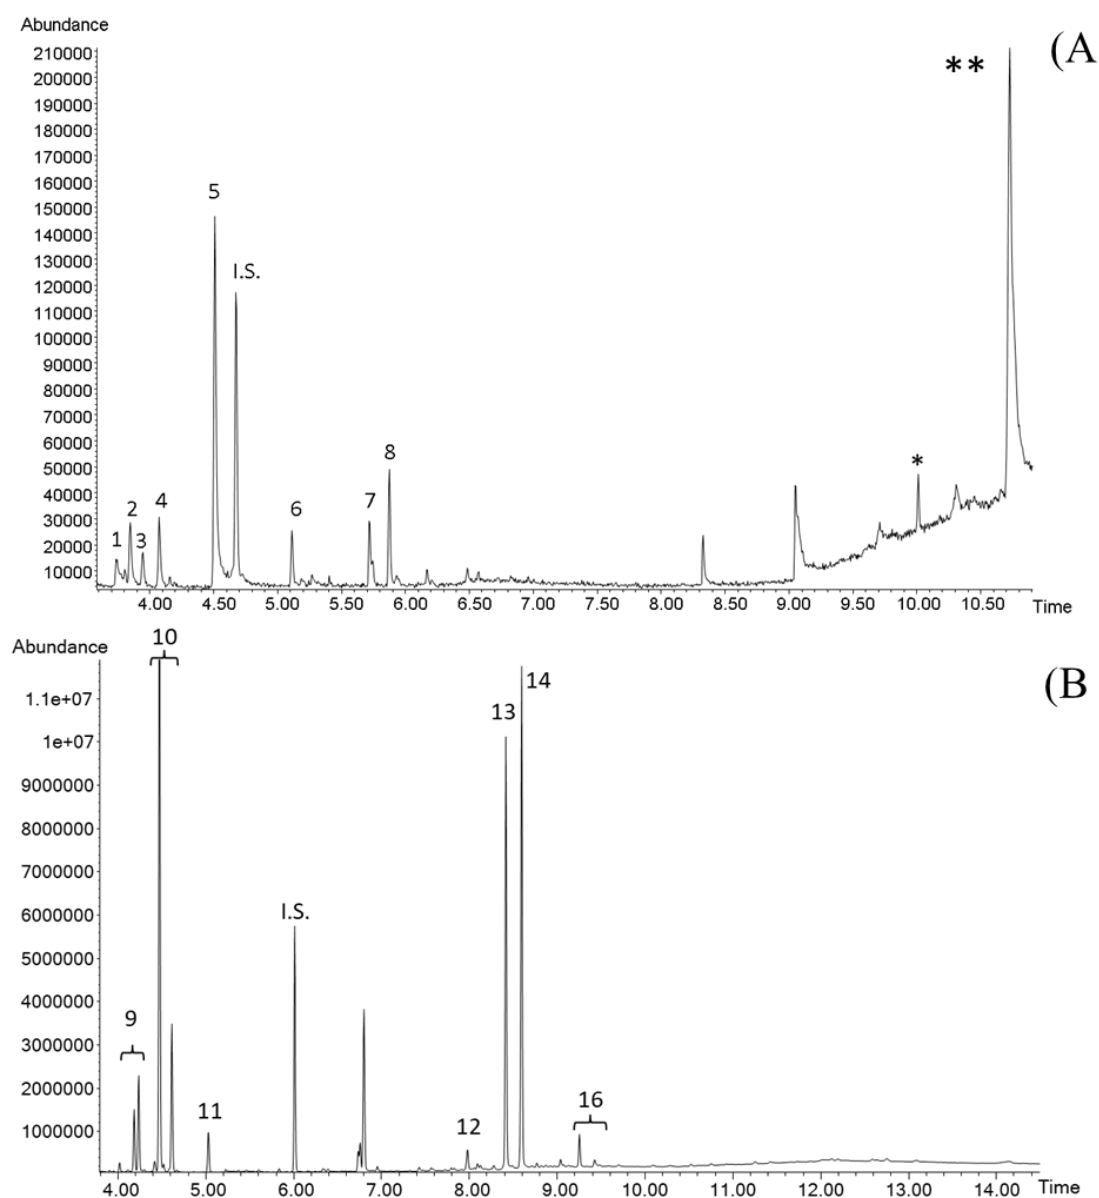

Figure S2. Mass spectrum of trimethylsilyl oxime derivatized picrocrocin and proposed fragmentation pattern for characteristic fragment 237  $m/z$ .

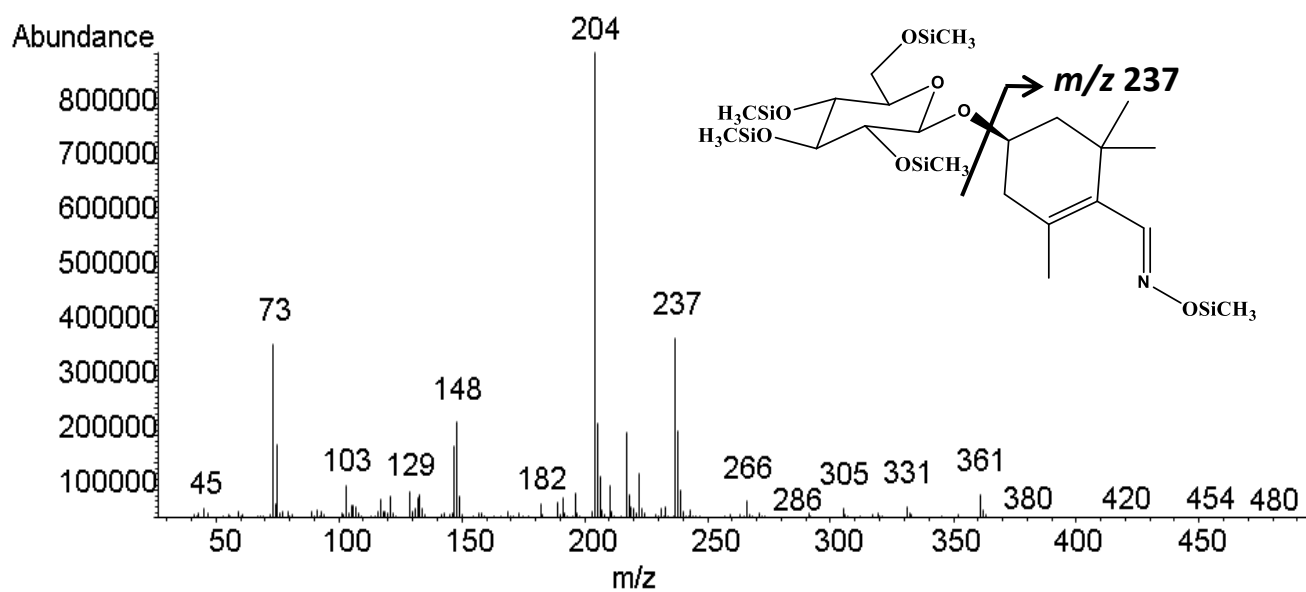



Figure S3. (A) Principal component analysis (PCA) biplot of multi-analytical data for dried saffron stigmas (DS), commercial saffron extracts (SE), and food supplements (SFS) under study obtained by HPLC-DAD (Kaempferol glycosides, picrocrocin, crocins and safranal) and by GC-MS (volatiles, monosaccharides, *myo*-inositol, disaccharides and sugars from maltodextrins); (B) Projection of the variables on the factor plane (factor 1 vs. factor 2).

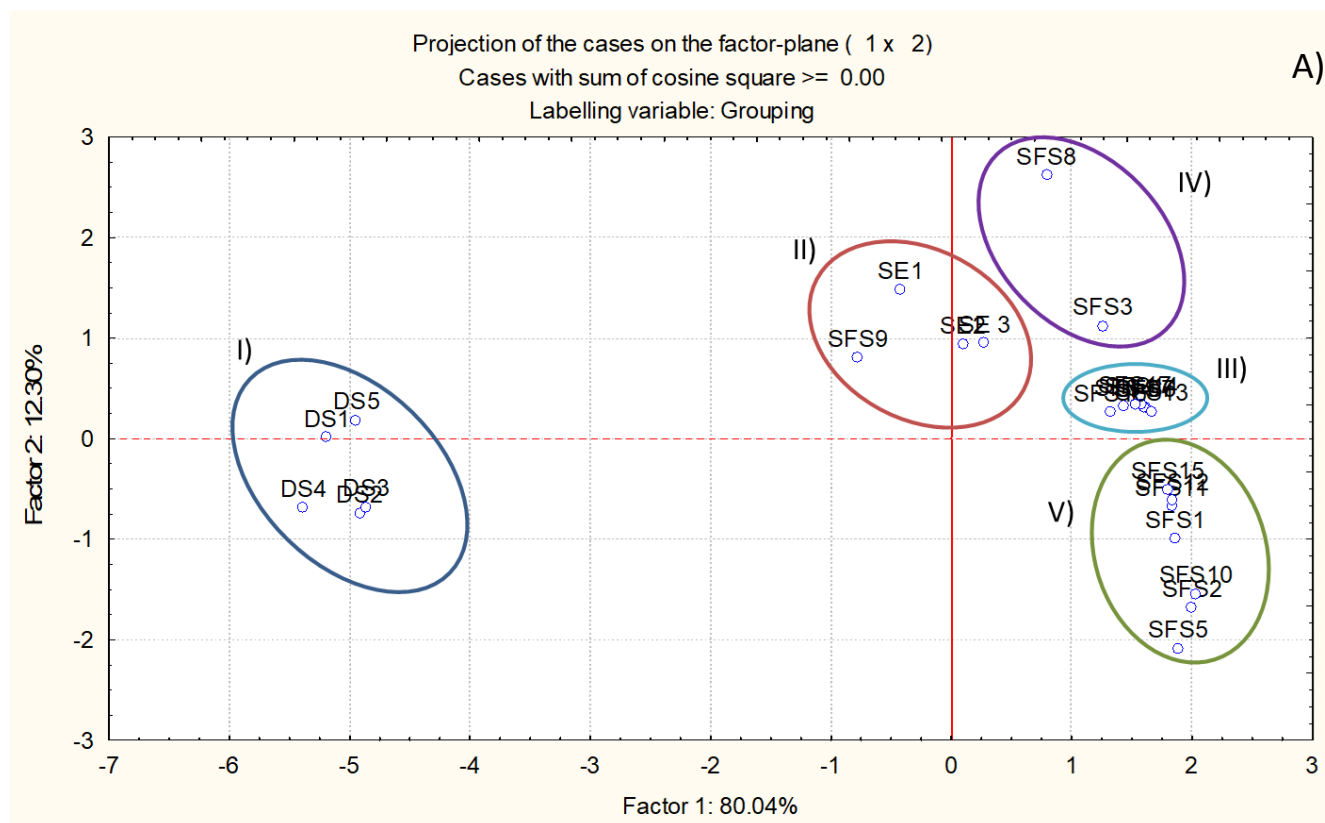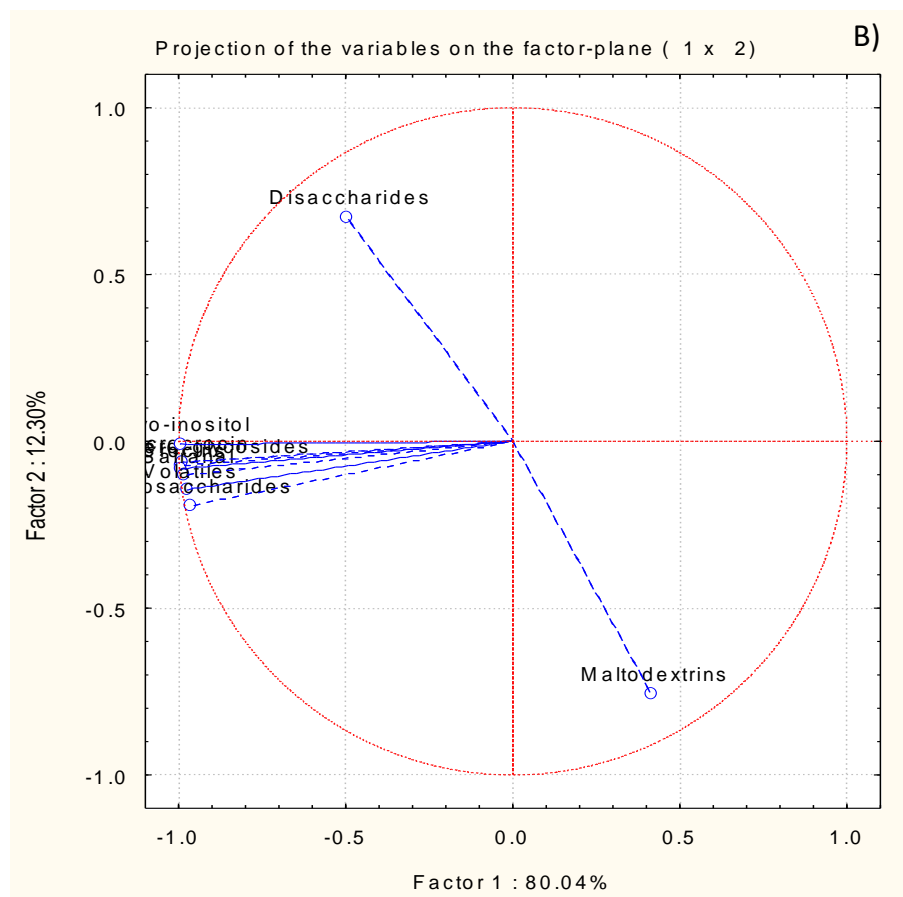

Supplement: s1 [file s1]
